# Supplementary material for: An eco-friendly luminescent solar concentrator with high photon transport efficiency based on Bi-doped Cs2Na0.6Ag0.4InCl6 quantum dots
Source: Royal Society of Chemistry journal article supplement (doi:10.1039/d4tc01758g), 2024-01-01
Supplement: d4tc01758g1.pdf [file d4tc01758g1.pdf]

Eco-friendly Luminescent solar concentrator with high photon transport  
efficiency based on Bi-doped  $\text{Cs}_2\text{Na}_{0.6}\text{Ag}_{0.4}\text{InCl}_6$  quantum dots

*Shaohua Li,<sup>a,b</sup> Yi Zhang,<sup>b,d</sup> Zihan Song,<sup>b</sup> Zida Zheng,<sup>b</sup> Xiaowei Zhang<sup>\*,b,e</sup> and Xueyun Liu<sup>\*,a,c</sup>*

<sup>a</sup>Laboratory of Infrared Materials and Devices, Advanced Technology Research Institute,  
Ningbo University, Ningbo 315211, China

<sup>b</sup>Department of Electrical Engineering and Computer Science, Ningbo University, Ningbo  
15211, China

<sup>c</sup>Ningbo Institute of Oceanography, Ningbo, 315832, China

<sup>d</sup>School of Materials Science and Engineering, Hanshan Normal University, Chaozhou  
521041, China

<sup>e</sup>National Laboratory of Solid State Microstructures, Nanjing University, Nanjing 210093,  
China

### **PL QY calculations for Bi-doped Cs<sub>2</sub>Na<sub>0.6</sub>Ag<sub>0.4</sub>InCl<sub>6</sub> DP QDs**

The PL QY of Bi-doped Cs<sub>2</sub>Na<sub>0.6</sub>Ag<sub>0.4</sub>InCl<sub>6</sub> QDs was measured with the integrating sphere and then directly calculated by the following equation,

$$PLQY = \frac{N_{PL}}{N_{abs}} = \frac{\int (I_{sample}(\lambda) - I_{reference}(\lambda)) d\lambda}{\int (E_{sample}(\lambda) - E_{reference}(\lambda)) d\lambda}, \quad (S1)$$

where  $I_{sample}$  and  $E_{sample}$  are the intensity of the emission and excitation light after correction for the QD samples, respectively.  $I_{reference}$  and  $E_{reference}$  are the intensity of the emission and excitation light after correction for the reference samples (pure n-hexane solution) in a quartz cuvette, respectively. The  $\eta_{LSC,PL}$  of LSCs (by encapsulating the QDs in the PDMS) was characterized in the same way as that of the QDs solution.

### **The haze of LSC**

Total transmission ( $T_t$ ) and diffusion transmission ( $T_d$ ) data in Fig.S7. a are used to calculate the haze of LSC in visible light. A double-beam Shimadzu UV-3600 spectrophotometer with the integrating sphere is used to measure the  $T_t$  and  $T_d$ . These measurements are taken over the wavelength range from 250 nm to 800 nm. The haze is calculated as follows:

$$Haze = \frac{T_d}{T_t}. \quad (S2)$$

### **The external quantum efficiency ( $\eta_{ext}$ ) of LSC**

The  $\eta_{ext}$  can be calculated as:

$$\eta_{ext} = \eta_{abs} \times \eta_{int} = (1 - R) \frac{\int_0^\infty AM1.5G(\lambda)(1 - e^{-\alpha(\lambda)d}) d\lambda}{\int_0^\infty AM1.5G(\lambda)\lambda} \times \eta_{int},$$

where  $\eta_{abs}$  is the absorption efficiency of LSC, AM1.5G( $\lambda$ ) is the solar radiation intensity obtained using a solar simulator AM1.5G,  $\alpha(\lambda)$  is the absorption coefficient of the LSC,  $d$  is the thickness of the LSC (0.5 cm),  $R$  is reflectivity (0.03 in this work).

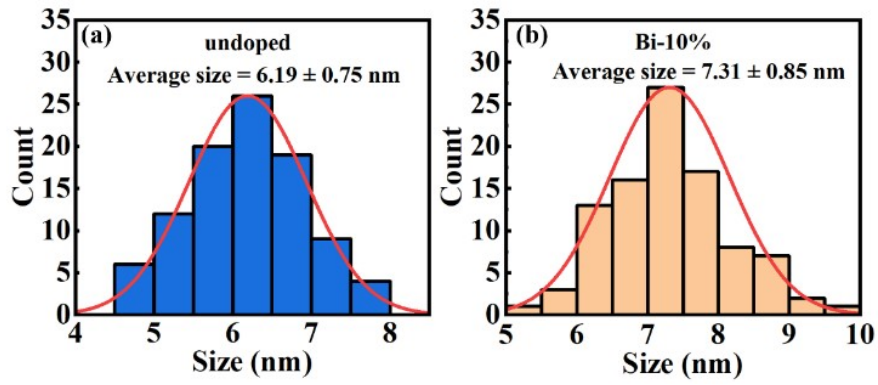

Fig. S1 Histogram of the size distribution of (a) undoped and (b) Bi-doped  $\text{Cs}_2\text{Na}_{0.6}\text{Ag}_{0.4}\text{InCl}_6$  QDs.

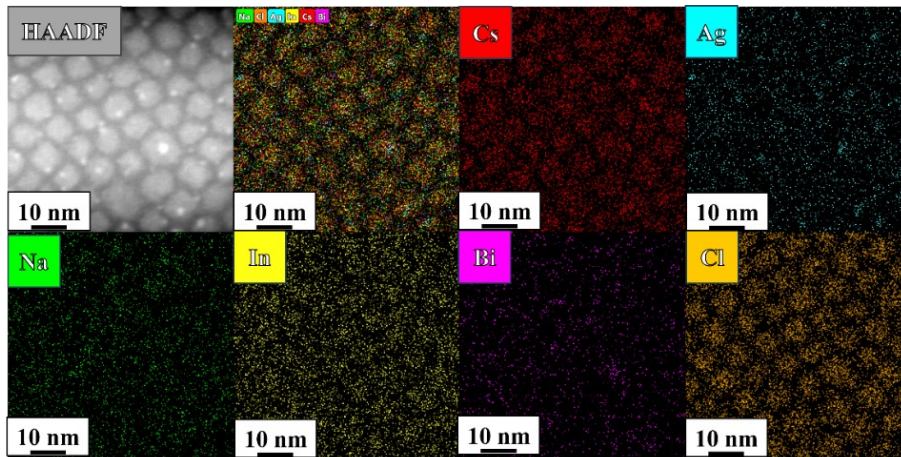

Fig. S2 TEM-EDX elemental images of Bi-doped  $\text{Cs}_2\text{Na}_{0.6}\text{Ag}_{0.4}\text{InCl}_6$  QDs.

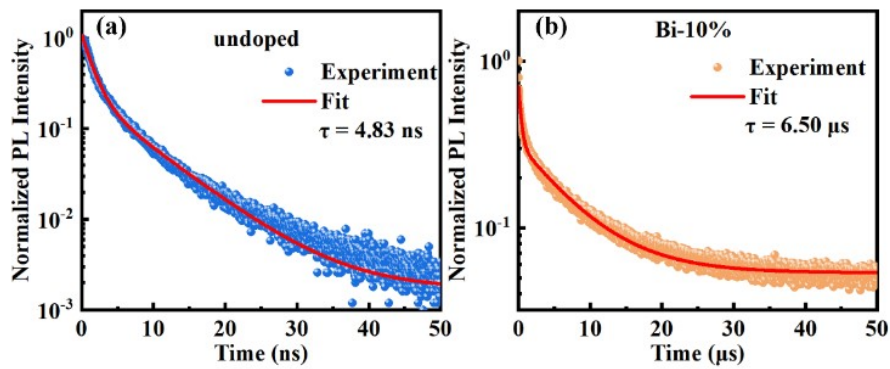

Fig. S3 PL decay curves of (a) undoped and (b) Bi-doped  $\text{Cs}_2\text{Na}_{0.6}\text{Ag}_{0.4}\text{InCl}_6$  QDs.

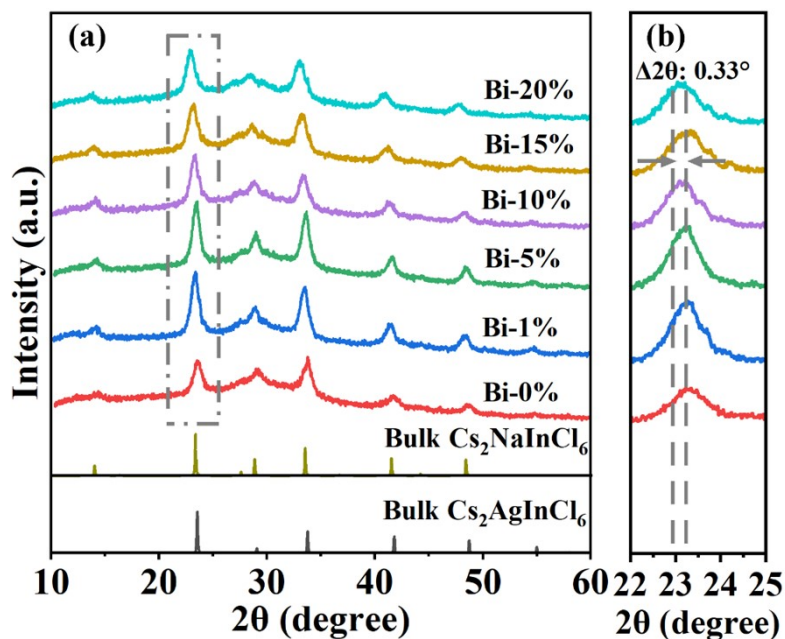

Fig. S4 XRD pattern of Bi-doped  $\text{Cs}_2\text{Na}_{0.6}\text{Ag}_{0.4}\text{InCl}_6$  QDs with  $\text{Bi}^{3+}$  cation concentration.

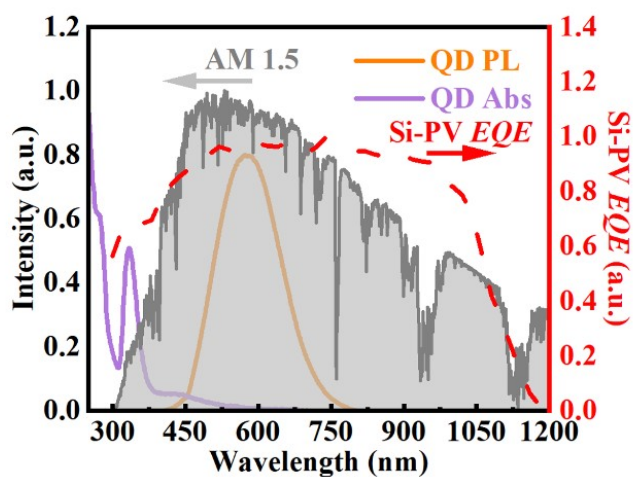

Fig. S5 Absorption (purple line) and PL (orange line) spectra of Bi-doped  $\text{Cs}_2\text{Na}_{0.6}\text{Ag}_{0.4}\text{InCl}_6$  QDs. Grey shading is the AM 1.5G solar spectrum and the red-dash line is a typical Si PV cell *EQE* spectrum (the PV cell is purchased from ANGUI company of Ningbo, and its *EQE* spectrum is tested by a solar cells energy conversion system CEL-QPCE1000).

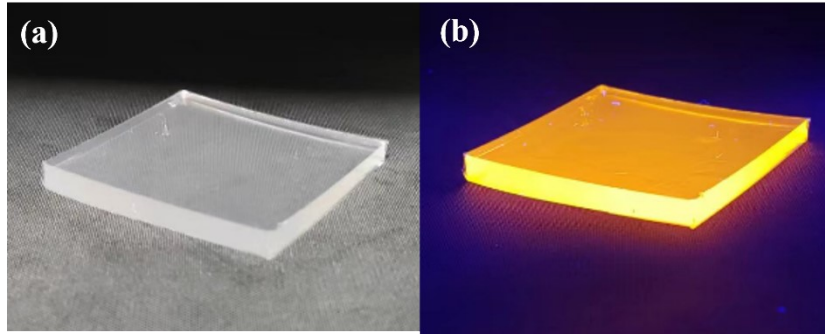

Fig. S6 The photograph of LSC with 3 mg/ml QDs under (a) ambient light; (b) UV lamp irradiation

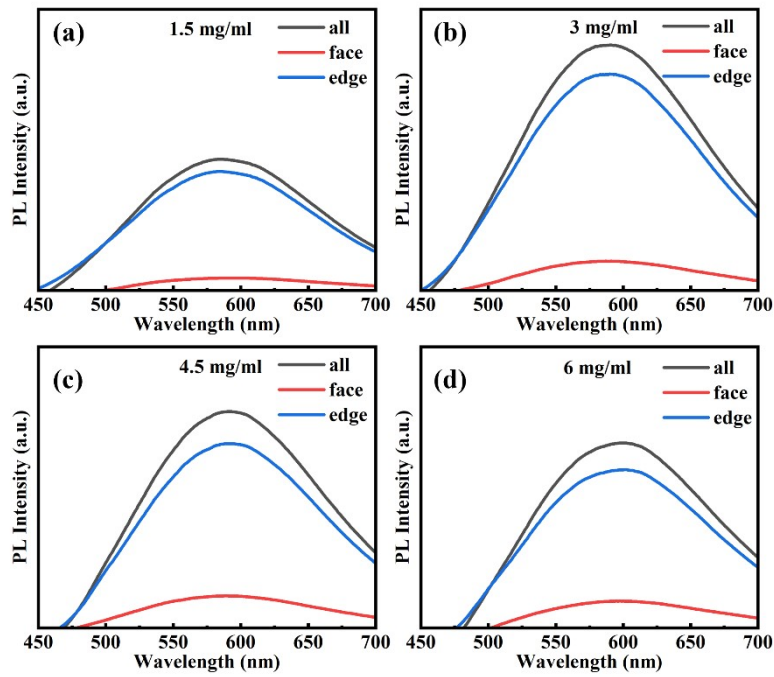

**Fig. S7** (a-d) The measurements of the edge-emission efficiency ( $\eta_{\text{edge}}$ ) of LSCs with the different Bi-doped  $\text{Cs}_2\text{Na}_{0.6}\text{Ag}_{0.4}\text{InCl}_6$  QDs concentrations. The black lines are the total PL intensity from the unmasked LSCs. The red lines are the face PL intensity from the LSC with the four masked edges using black tapes. The blue line is defined as the edge PL intensity calculated as  $I_{\text{edge}} = I_{\text{all}} - I_{\text{face}}$ . Finally,  $\eta_{\text{edge}} = I_{\text{edge}} / I_{\text{all}}$ .

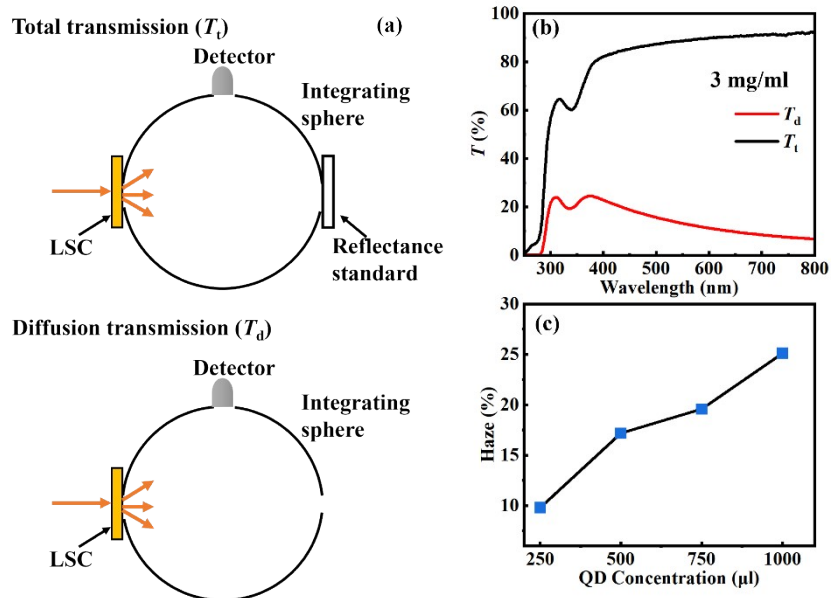

**Fig. S8** (a) The schematic of the  $T_t$  and  $T_d$  measurements. (b) The  $T_t$  and  $T_d$  of the LSC with 3 mg/ml Bi-doped  $\text{Cs}_2\text{Na}_{0.6}\text{Ag}_{0.4}\text{InCl}_6$  QDs. (c) The haze of as-fabricated LSCs as a function of QD concentration.

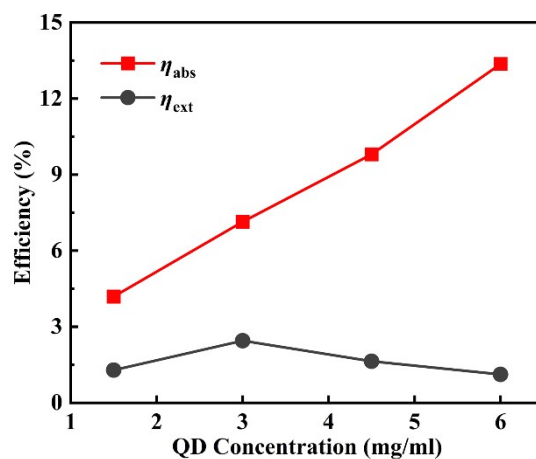

**Fig. S9**  $\eta_{\text{abs}}$  and  $\eta_{\text{int}}$  of LSCs with different QD concentrations.

**Table S1** Photovoltaic parameters of LSC-PV systems

| QDs concentration (mg/ml) | $J_{\text{sc-LSC}}$ (mA/cm <sup>2</sup> ) | $V_{\text{oc}}$ (V) | $FF$ (%) | $PCE$ (%) | $\eta_{\text{opt}}$ (%) |
|---------------------------|-------------------------------------------|---------------------|----------|-----------|-------------------------|
| 1.5                       | 2.41                                      | 0.50                | 60.08    | 2.30      | 2.34                    |
| 3                         | 2.64                                      | 0.50                | 60.25    | 2.56      | 2.57                    |
| 4.5                       | 2.30                                      | 0.50                | 60.09    | 2.19      | 2.25                    |
| 6                         | 2.30                                      | 0.50                | 59.92    | 2.19      | 2.23                    |

**Table S2** Aesthetic quality parameters of as-fabricated LSCs.

| <b>QD concentration<br/>(mg/ml)</b> | <b>CIE1931</b> |          | <b>CRI</b> | <b>AVT (%)</b> |
|-------------------------------------|----------------|----------|------------|----------------|
|                                     | <b>x</b>       | <b>y</b> |            |                |
| 1.5                                 | 0.3357         | 0.3356   | 95.6       | 93.68          |
| 3                                   | 0.3372         | 0.3369   | 95.5       | 91.55          |
| 4.5                                 | 0.3378         | 0.3376   | 95.6       | 88.88          |
| 6                                   | 0.3403         | 0.3398   | 95.8       | 85.62          |
| Quartz glass                        | 0.3434         | 0.3460   | 97.0       | 82.85          |
